# Supplementary material for: Household malaria knowledge and its association with bednet ownership in settings without large–scale distribution programs: Evidence from rural Madagascar
Source: PubMed Central journal article supplement (PMC4073249; doi:10.7189/jogh.04.010401), 2014-06
Supplement: jogh-04-010401-s001.pdf [file jogh-04-010401-s001.pdf]

## Online Supplementary Document

Krezanoski PJ et al. Household malaria knowledge and its association with bednet ownership in settings without large-scale distribution programs: Evidence from rural Madagascar  
Journal of Global Health 2014;4:010401

**Supplemental table 1: Correlates of household bednet ownership in sample restricted to HOUSEHOLD HEADS (HH)**

| Variable                                          | Bivariate analysis |         | Multivariate analysis |         |
|---------------------------------------------------|--------------------|---------|-----------------------|---------|
|                                                   | OR (95% CI)        | P value | OR (95% CI)           | P value |
| <b>Head of household characteristics</b>          |                    |         |                       |         |
| Age of HH                                         | 1.01 (0.98—1.04)   | 0.453   | –                     | –       |
| Gender of HH                                      | 0.79 (0.23—2.67)   | 0.706   | –                     | –       |
| Education level of HH                             | 1.06 (0.88—1.29)   | 0.531   | –                     | –       |
| <b>Household characteristics</b>                  |                    |         |                       |         |
| Number of HH members                              | 1.14 (0.97—1.35)   | 0.123   | 3.75 (0.97—14.55)     | 0.056   |
| Reported fever in last month                      | 3.50 (1.03—11.89)  | 0.044   | 1.03 (0.80—1.32)      | 0.824   |
| Number of children under 5 years                  | 0.90 (0.46—1.75)   | 0.755   | –                     | –       |
| Number of pregnant women                          | –                  | –       | –                     | –       |
| Open water source                                 | 1.24 (0.32—4.82)   | 0.753   | –                     | –       |
| Distance to water source (mns walk)               | 1.02 (0.95—1.09)   | 0.567   | –                     | –       |
| <b>Wealth index</b>                               |                    |         |                       |         |
| ...quintile relative to lowest wealth quintile    |                    |         |                       |         |
| Second                                            | –                  | –       | –                     | –       |
| Third                                             | –                  | –       | –                     | –       |
| Fourth                                            | 0.35 (0.03—3.45)   | 0.366   | 0.28 (0.03—3.10)      | 0.302   |
| Fifth                                             | 2.77 (0.67—11.36)  | 0.158   | 2.90 (0.47—17.80)     | 0.251   |
| <b>Respondent perception/knowledge of malaria</b> |                    |         |                       |         |
| Reports fever most frequent illness in village    | 0.72 (0.15—3.49)   | 0.684   | –                     | –       |
| Reports fever most dangerous illness in village   | 1.41 (0.42—4.74)   | 0.581   | –                     | –       |
| Malaria knowledge index                           | 4.77 (1.01—22.55)  | 0.049   | 5.82 (1.10—30.84)     | 0.038   |

N = 250 observations.

CI – confidence interval

**Supplemental table 2: Correlates of household bednet ownership in sample restricted to WIVES of household heads**

| Variable                                          | Bivariate analysis |         | Multivariate analysis |         |
|---------------------------------------------------|--------------------|---------|-----------------------|---------|
|                                                   | OR (95% CI)        | P value | OR (95% CI)           | P value |
| <b>Head of household characteristics</b>          |                    |         |                       |         |
| Age of wife                                       | 1.01 (0.99—1.04)   | 0.349   | –                     | –       |
| Gender of wife                                    | –                  | –       | –                     | –       |
| Education level of wife                           | 1.05 (0.91—1.20)   | 0.510   | –                     | –       |
| <b>Household characteristics</b>                  |                    |         |                       |         |
| Number of household members                       | 1.11 (0.97—1.27)   | 0.139   | 1.10 (0.95—1.26)      | 0.200   |
| Reported fever in last month                      | 1.58 (0.74—3.36)   | 0.234   | 1.35 (0.61—2.98)      | 0.458   |
| Number of children under 5 years                  | 1.12 (0.74—1.69)   | 0.588   | –                     | –       |
| Number of pregnant women                          | 1.72 (0.51—5.84)   | 0.382   | –                     | –       |
| Open water source                                 | 1.12 (0.51—2.45)   | 0.777   | –                     | –       |
| Distance to water source (mns walk)               | 1.01 (0.96—1.05)   | 0.792   | –                     | –       |
| <b>Wealth index</b>                               |                    |         |                       |         |
| ...quintile relative to lowest wealth quintile    |                    |         |                       |         |
| Second                                            | 0.34 (0.08—1.35)   | 0.124   | 0.43 (0.10—1.78)      | 0.246   |
| Third                                             | 0.72 (0.23—2.24)   | 0.566   | 0.92 (0.29—2.98)      | 0.892   |
| Fourth                                            | 0.46 (0.13—1.63)   | 0.227   | 0.61 (0.16—2.25)      | 0.455   |
| Fifth                                             | 1.34 (0.48—3.74)   | 0.572   | 1.98 (0.66—5.96)      | 0.221   |
| <b>Respondent perception/knowledge of malaria</b> |                    |         |                       |         |
| Reports fever most frequent illness in village    | 0.54 (0.19—1.56)   | 0.254   | –                     | –       |
| Reports fever most dangerous illness in village   | 1.23 (0.56—2.69)   | 0.604   | –                     | –       |
| Malaria knowledge index                           | 3.28 (1.41—7.67)   | 0.006   | 3.53 (1.44—8.68)      | 0.006   |

N = 254 observations unless specified.

**Supplemental table 3: Correlates of household bednet ownership in sample restricted to HOUSEHOLD DECISION MAKERS (Household Heads (HH) or WIVES)**

| Variable                                          | Bivariate analysis |         | Multivariate analysis |         |
|---------------------------------------------------|--------------------|---------|-----------------------|---------|
|                                                   | OR (95% CI)        | P value | OR (95% CI)           | P value |
| <b>Head of household characteristics*</b>         |                    |         |                       |         |
| Age of HH                                         | 1.01 (0.98—1.05)   | 0.429   | –                     | –       |
| Gender of HH                                      | 0.80 (0.24—2.69)   | 0.715   | –                     | –       |
| Education level of HH                             | 1.06 (0.87—1.28)   | 0.559   | –                     | –       |
| <b>Household characteristics</b>                  |                    |         |                       |         |
| Number of household members                       | 1.15 (1.04—1.27)   | 0.007   | 1.10 (0.98—1.24)      | 0.095   |
| Reported fever in last month                      | 2.21 (1.17—4.17)   | 0.015   | 1.82 (0.94—3.54)      | 0.076   |
| Number of children under 5 years                  | 1.09 (0.77—1.52)   | 0.638   | –                     | –       |
| Number of pregnant women                          | 1.48 (0.45—4.85)   | 0.517   | –                     | –       |
| Open water source                                 | 1.07 (0.55—2.09)   | 0.843   | –                     | –       |
| Distance to water source (mns walk)               | 1.01 (0.97—1.05)   | 0.652   | –                     | –       |
| <b>Wealth index</b>                               |                    |         |                       |         |
| ...quintile relative to lowest wealth quintile    |                    |         |                       |         |
| Second                                            | 1.15 (0.46—4.91)   | 0.497   | 1.05 (0.31—3.56)      | 0.935   |
| Third                                             | 1.03 (0.29—3.68)   | 0.962   | 0.80 (0.22—2.96)      | 0.739   |
| Fourth                                            | 1.96 (0.63—6.06)   | 0.244   | 1.29 (0.39—4.21)      | 0.675   |
| Fifth                                             | 3.8 (1.33—10.73)   | 0.013   | 2.68 (0.86—8.34)      | 0.089   |
| <b>Respondent perception/knowledge of malaria</b> |                    |         |                       |         |
| Reports fever most frequent illness in village    | 0.66 (0.28—1.56)   | 0.347   | –                     | –       |
| Reports fever most dangerous illness in village   | 1.46 (0.77—2.80)   | 0.249   | 1.19 (0.60—2.34)      | 0.620   |
| Malaria knowledge index                           | 3.64 (1.75—7.59)   | 0.001   | 3.41 (1.59—7.32)      | 0.002   |

N = 560 observations unless specified. \*N= 286 because of missing variables.

CI – confidence interval
